# Supplementary material for: Inhibition of checkpoint kinase 2 (CHK2) enhances sensitivity of pancreatic adenocarcinoma cells to gemcitabine
Source: PubMed Central journal article supplement (PMC4159025; doi:10.1111/jcmm.12101), 2013-07-16

# Supplementary Figure S1

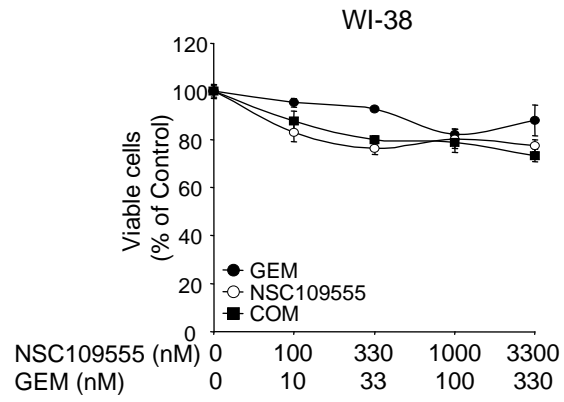

# Supplementary Figure S2

**A**

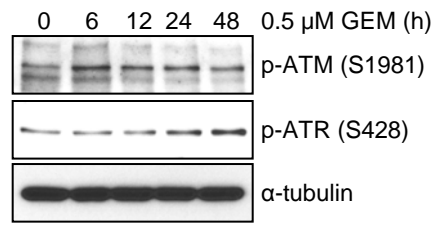

**B**

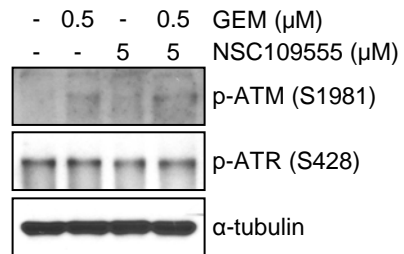

Supplement: jcmm0017-1261-SD2.pdf [file jcmm0017-1261-SD2.pdf]
